# Supplementary material for: Structure and Vibrational Spectroscopy of C82 Fullerenol Valent Isomers: An Experimental and Theoretical Joint Study
Source: MDPI journal article supplement (doi:10.3390/molecules28041569), 2023-02-06
Supplement: s1 [file s1]

# Supplement Materials

## Structure and Vibrational Spectroscopy of Valent Isomers C<sub>82</sub> Fullerenols: an Experimental and Theoretical Joint Study

Felix N. Tomilin<sup>1,2,\*</sup>, Polina V. Artyushenko<sup>2,3,4</sup>, Irina A. Shchugoreva<sup>3,4</sup>,  
Anastasia V. Rogova<sup>2,4</sup>, Natalia G. Vnukova<sup>1,2</sup>, Grigory N. Churilov<sup>1,2</sup>, Nikolay P. Shestakov<sup>1,2</sup>,  
Olga N. Tchaikovskaya<sup>5</sup>, Sergei G. Ovchinnikov<sup>1,2</sup>, Pavel V. Avramov<sup>6,\*\*</sup>

<sup>1</sup>Kirensky Institute of Physics, Federal Research Center KSC SB RAS, Krasnoyarsk, Russia

<sup>2</sup>Siberian Federal University, Krasnoyarsk, Russia

<sup>3</sup>Laboratory for Digital Controlled Drugs and Theranostics, Federal Research Center KSC SB RAS, Krasnoyarsk, Russia

<sup>4</sup>Laboratory for Biomolecular and Medical Technologies, Krasnoyarsk State Medical University, Krasnoyarsk, Russia

<sup>5</sup>Department of Physics, Tomsk State University, Tomsk, Russia

<sup>6</sup>Kyungpook National University, Daegu, Republic of Korea

\*e-mail: felixnt@gmail.com

\*\*e-mail: paul.veniaminovich@knu.ac.kr

**Abstract** Gd@C<sub>82</sub>O<sub>x</sub>H<sub>y</sub> endohedral complexes for advanced biomedical applications (computer tomography, cancer treatment, etc.) were synthesized using high-frequency arc plasma discharge through a mixture of graphite and Gd<sub>2</sub>O<sub>3</sub> oxide. The Gd@C<sub>82</sub> endohedral complex was isolated by high-efficiency liquid chromatography and consequently oxidized with formation of a family of Gd endohedral fullerenols with gross formula Gd@C<sub>82</sub>O<sub>8</sub>(OH)<sub>20</sub>. Fourier-transformed infra-red (FT-IR) spectroscopy was used to study structure and spectroscopic properties of the complexes in combination with DFTB3 electronic structure calculations and infra-red spectra simulations. It was shown that the main IR spectral features are formed by fullerene C<sub>82</sub> cage which allows one to consider the force constants at DFTB3 level of theory without consideration of gadolinium endohedral ions inside the carbon cage. Based on the comparison of experimental FT-IR and theoretical DFTB3 IR spectra it was found that oxidation of C<sub>82</sub> cage causes formation of Gd@C<sub>82</sub>O<sub>28</sub>H<sub>20</sub> with breakdown of the integrity of parent C<sub>82</sub> cage with formation of pores between neighboring carbonyl and carboxyl groups. The Gd@C<sub>82</sub>O<sub>6</sub>(OOH)<sub>2</sub>(OH)<sub>18</sub> endohedral complex with epoxy, carbonyl and carboxyl groups was considered as the most reliable fullerene structural model.

**Keywords:** C<sub>82</sub>, Gd endohedral complexes, biomedical applications, fullerenols, DFTB3 electronic structure calculations, IR spectra

## CARTESIAN COORDINATES

Atomic Cartesian coordinates for equilibrium structures of studied complexes of  $C_{82}$  fullerenols (in Å: X, Y, Z) are presented below.

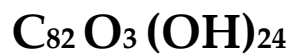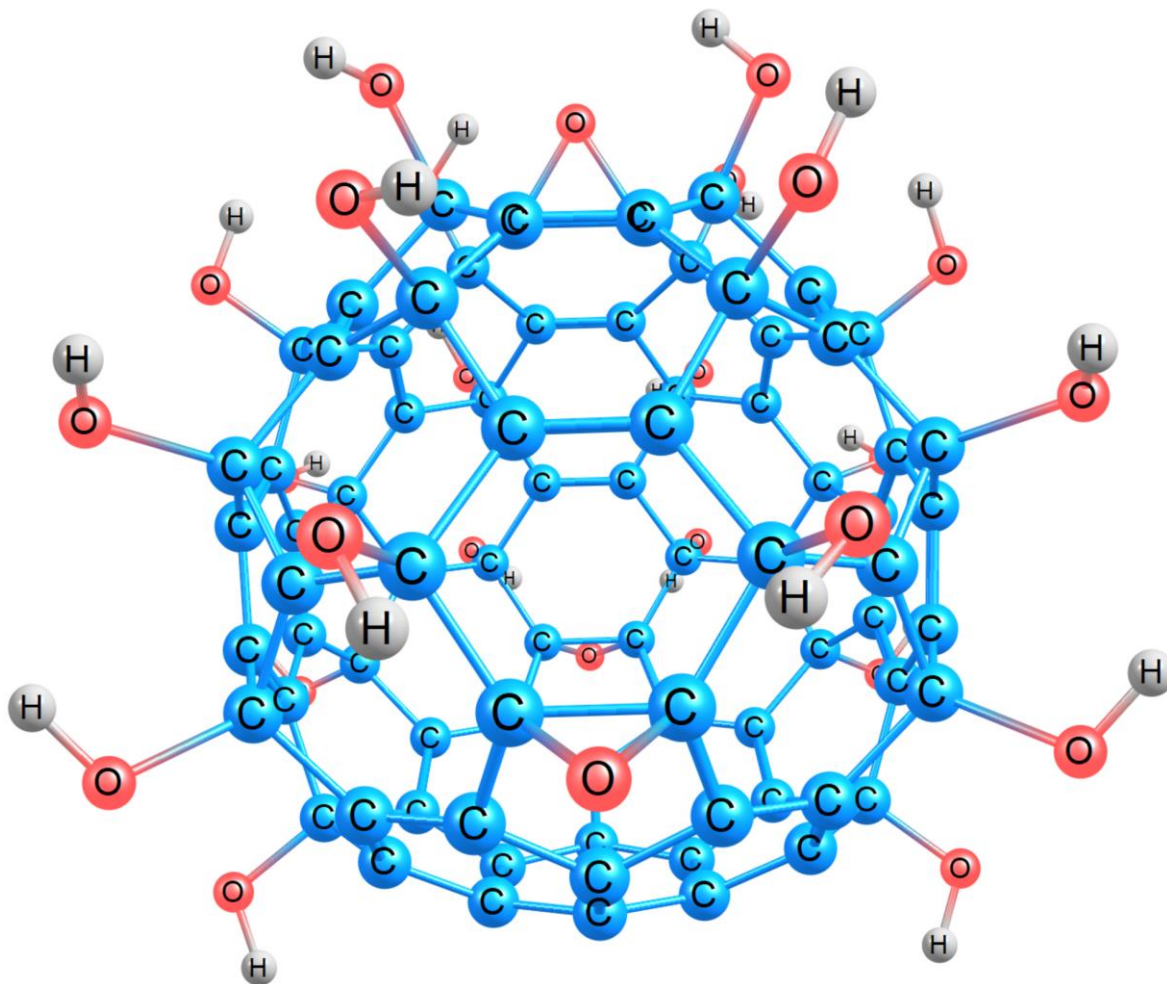

### DFTB3/3ob-3-1// Ground state

|   |                 |                 |                |
|---|-----------------|-----------------|----------------|
| C | -2.633905408817 | 0.397581121835  | 3.485446169396 |
| C | 2.682739063779  | 0.283566937873  | 3.441110737430 |
| C | -3.069223003628 | 1.505346063341  | 2.695103838800 |
| C | 3.103964922613  | -0.970587089549 | 2.901719552697 |
| C | 3.149631432585  | 1.371667828387  | 2.641785713787 |
| C | -3.115135761575 | -0.837255108604 | 2.952054986657 |
| C | -3.955905427232 | 0.975910383540  | 1.601788165265 |
| C | 3.966350850176  | -0.693715625664 | 1.701098095242 |

|   |                 |                 |                 |
|---|-----------------|-----------------|-----------------|
| C | 3.993662188175  | 0.804644688643  | 1.534591913286  |
| C | -3.983401953190 | -0.522681295738 | 1.765919305216  |
| C | -2.502867795853 | 3.603899445348  | 1.418396695341  |
| C | 2.515638565872  | -3.295234299488 | 2.124224199043  |
| C | 2.655895898788  | 3.494794607427  | 1.374880881357  |
| C | -2.643150805825 | -3.186209759558 | 2.166846781993  |
| C | -4.020432878162 | 1.648186122234  | 0.217475130883  |
| C | 4.003065669160  | -1.651135169256 | 0.495013879765  |
| C | 4.056954973173  | 1.468279758319  | 0.149852897939  |
| C | -4.074573712134 | -1.471523237340 | 0.560342533732  |
| C | -3.129461701560 | 2.892635708688  | 0.201950261893  |
| C | 3.114847825597  | -2.867056546687 | 0.769279761662  |
| C | 3.236088726545  | 2.761431789761  | 0.147777842919  |
| C | -3.250914524502 | -2.736017647769 | 0.822147546623  |
| C | -2.315100314935 | 2.677981455769  | 2.617907541834  |
| C | 2.351004969954  | -2.130127814047 | 3.097263711604  |
| C | 2.446336569873  | 2.575980054844  | 2.576656711835  |
| C | -2.410444144881 | -2.028496948059 | 3.135350759586  |
| C | -3.637159688357 | 0.615714910697  | -0.924200797605 |
| C | 3.593348941349  | -0.890688044602 | -0.835546455646 |
| C | 3.604861826355  | 0.456004250779  | -0.977823542549 |
| C | -3.648531627321 | -0.729654828654 | -0.769869735662 |
| C | -2.507477701867 | 3.465335530430  | -1.064268879539 |
| C | 2.467553859862  | -3.699931552329 | -0.328666436856 |
| C | 2.611806855824  | 3.359523425496  | -1.110084883511 |
| C | -2.651765592782 | -3.594673858356 | -0.288437871890 |
| C | -2.337364891945 | 2.421128584912  | -2.142763693029 |
| C | 2.272336351965  | -2.914911918655 | -1.604646154271 |
| C | 2.373734533901  | 2.318929129929  | -2.176154430988 |
| C | -2.438633500916 | -2.811397019732 | -1.560078648290 |
| C | -3.317743554511 | 1.254691565407  | -2.308851580954 |

|   |                 |                 |                 |
|---|-----------------|-----------------|-----------------|
| C | 3.246239497512  | -1.814747228184 | -2.041001084078 |
| C | 3.303154311485  | 1.121794829468  | -2.354834080917 |
| C | -3.374401702490 | -1.679665667236 | -1.975214789107 |
| C | -2.485066071897 | 0.325880629849  | -3.200713192524 |
| C | 2.392772299914  | -1.100184294477 | -3.095732192581 |
| C | 2.426450281899  | 0.226521144910  | -3.247058245526 |
| C | -2.518842808835 | -1.001892303563 | -3.059105559609 |
| C | -1.232397923443 | 2.308853057940  | -2.904624047705 |
| C | 1.151367177490  | -2.968609695641 | -2.349332943946 |
| C | 1.249628982441  | 2.249495030968  | -2.913901673671 |
| C | -1.330512890385 | -2.906675445698 | -2.318820439939 |
| C | -1.340899512371 | 1.114622201489  | -3.873109125257 |
| C | 1.236560114441  | -2.013709068086 | -3.556214140365 |
| C | 1.303932869417  | 1.056809672497  | -3.891608802253 |
| C | -1.408288075353 | -1.955119134112 | -3.531242225397 |
| C | -1.130440384485 | 3.888621236260  | -0.570200568766 |
| C | 1.102203483515  | -4.002229788186 | 0.274552960871  |
| C | 1.262247192406  | 3.838843542262  | -0.590747394727 |
| C | -1.290460376392 | -3.952713840231 | 0.294135098876  |
| C | -1.119965488484 | 3.968990300197  | 0.832205625633  |
| C | 1.121541548515  | -3.775971086298 | 1.660816509255  |
| C | 1.279755281409  | 3.918760105199  | 0.811286916657  |
| C | -1.278179005421 | -3.725661618325 | 1.680012684213  |
| C | -1.124918822489 | 2.766869634752  | 3.393046850471  |
| C | 1.177778441452  | -2.045644228086 | 3.898312567231  |
| C | 1.275175174424  | 2.715841487770  | 3.372959907480  |
| C | -1.222291757461 | -1.994464633116 | 3.917905349213  |
| C | -0.673313444695 | 1.667906926268  | 4.139037428110  |
| C | 0.739436637663  | -0.809668337657 | 4.396734492998  |
| C | 0.789597247653  | 1.636582209268  | 4.126499167143  |
| C | -0.723486802670 | -0.778361716667 | 4.408472699984  |

|   |                 |                 |                 |
|---|-----------------|-----------------|-----------------|
| C | -1.418930768379 | 0.453298277781  | 4.217070697108  |
| C | 1.483633947326  | 0.391126487844  | 4.192844464111  |
| C | -0.034711159976 | 0.275542123857  | -4.013125622198 |
| C | -0.074277821943 | -1.222167102457 | -3.848027876236 |
| C | 0.029012952000  | 3.190477054578  | -2.750615231740 |
| C | -0.104585555945 | -3.792567929274 | -1.980607209098 |
| C | 0.056858948995  | 3.765024514295  | -1.314150829384 |
| C | -0.100776029938 | -4.040738157145 | -0.453279597771 |
| C | 0.086296266964  | 3.961466479185  | 1.548201606308  |
| C | -0.069366761950 | -3.610100015363 | 2.383321760943  |
| C | 0.092223217944  | 3.671476844332  | 3.042383558594  |
| C | -0.044451607962 | -3.001954366657 | 3.778407267272  |
| O | 0.044845563967  | 4.229416084080  | -3.725089757322 |
| O | -0.138721641912 | -5.018569271745 | -2.705130241789 |
| H | -0.115076781933 | 3.844835044240  | -4.603132077916 |
| H | 0.000426979999  | -4.834460939795 | -3.649175131356 |
| O | 0.124258940936  | 4.887671408777  | 3.780797993297  |
| O | -0.057963056952 | -4.028371857194 | 4.764160904815  |
| H | 0.127556064930  | 4.693150019898  | 4.731275862869  |
| H | -0.042018624965 | -3.631745184370 | 5.649427457432  |
| O | -3.266047285533 | 4.763805810847  | 1.789422401204  |
| O | 3.289112665521  | -4.348456250041 | 2.722493337761  |
| O | 3.472570283449  | 4.620733582897  | 1.737087861224  |
| O | -3.449292355450 | -4.204533180112 | 2.782463170734  |
| H | -3.389103928457 | 5.318418676592  | 0.999678596536  |
| H | 3.397048576459  | -5.061739474723 | 2.069795438037  |
| H | 3.612367023345  | 5.168025826667  | 0.944973015555  |
| H | -3.605019316384 | -4.910413564761 | 2.131308854057  |
| O | -5.156061987657 | 0.287478647848  | 2.047394819081  |
| O | 5.173869583628  | 0.072554103943  | 1.960881932087  |
| O | -0.067399225956 | -0.607746269746 | -5.153090329685 |

|   |                 |                 |                 |
|---|-----------------|-----------------|-----------------|
| O | -3.282172160507 | 4.595289423908  | -1.545522114291 |
| O | 3.234550363514  | -4.909295644749 | -0.568870425764 |
| O | 3.416775313470  | 4.451034774002  | -1.622043502246 |
| O | -3.464811814449 | -4.769562040832 | -0.533583126757 |
| H | -4.166341508126 | 4.269840673074  | -1.789971228180 |
| H | 4.112710121135  | -4.646892108894 | -0.896566057587 |
| H | 4.217731319075  | 4.070265773179  | -2.022984033085 |
| H | -4.275031140084 | -4.483116005972 | -0.990754276554 |
| O | -4.549449001950 | 1.655257964226  | -2.914971534652 |
| O | 4.465867103964  | -2.340332175950 | -2.571323143814 |
| O | 4.533540786960  | 1.524647727297  | -2.964669174663 |
| O | -4.616398299925 | -2.202680350991 | -2.456772592883 |
| H | -4.360055551015 | 1.995310743086  | -3.805576222248 |
| H | 4.258499414061  | -2.865837246686 | -3.362230816478 |
| H | 5.232954001620  | 0.890505517610  | -2.735118223773 |
| H | -5.311930248601 | -1.531623052280 | -2.357402374907 |
| O | -5.381453673581 | 2.068529205041  | -0.034210528982 |
| O | 5.359314780560  | -2.119256723040 | 0.311966234874  |
| O | 5.442233013546  | 1.800439851208  | -0.148206193910 |
| O | -5.464985213526 | -1.857177503146 | 0.371328159818  |
| H | -5.968603256275 | 1.543427662279  | 0.540671823733  |
| H | 5.957695387291  | -1.479995123316 | 0.741471184642  |
| H | 6.000580798292  | 1.426255337329  | 0.558711820751  |
| H | -6.009759731272 | -1.329380009421 | 0.984690153571  |
| O | -1.693288588208 | 1.591536863269  | -5.177007078660 |
| O | 1.562593857282  | -2.763325480763 | -4.732418663843 |
| O | 1.640688863274  | 1.522515216327  | -5.203628739633 |
| O | -1.771797758212 | -2.694198722762 | -4.703070205847 |
| H | -1.389861872395 | 0.928641916556  | -5.825875350362 |
| H | 1.249381698442  | -2.253435908982 | -5.503516440508 |
| H | 2.517948371858  | 1.939493477124  | -5.171804406653 |

H    -2.647407990807    -3.091830970581    -4.562820263950

# First isomer

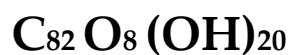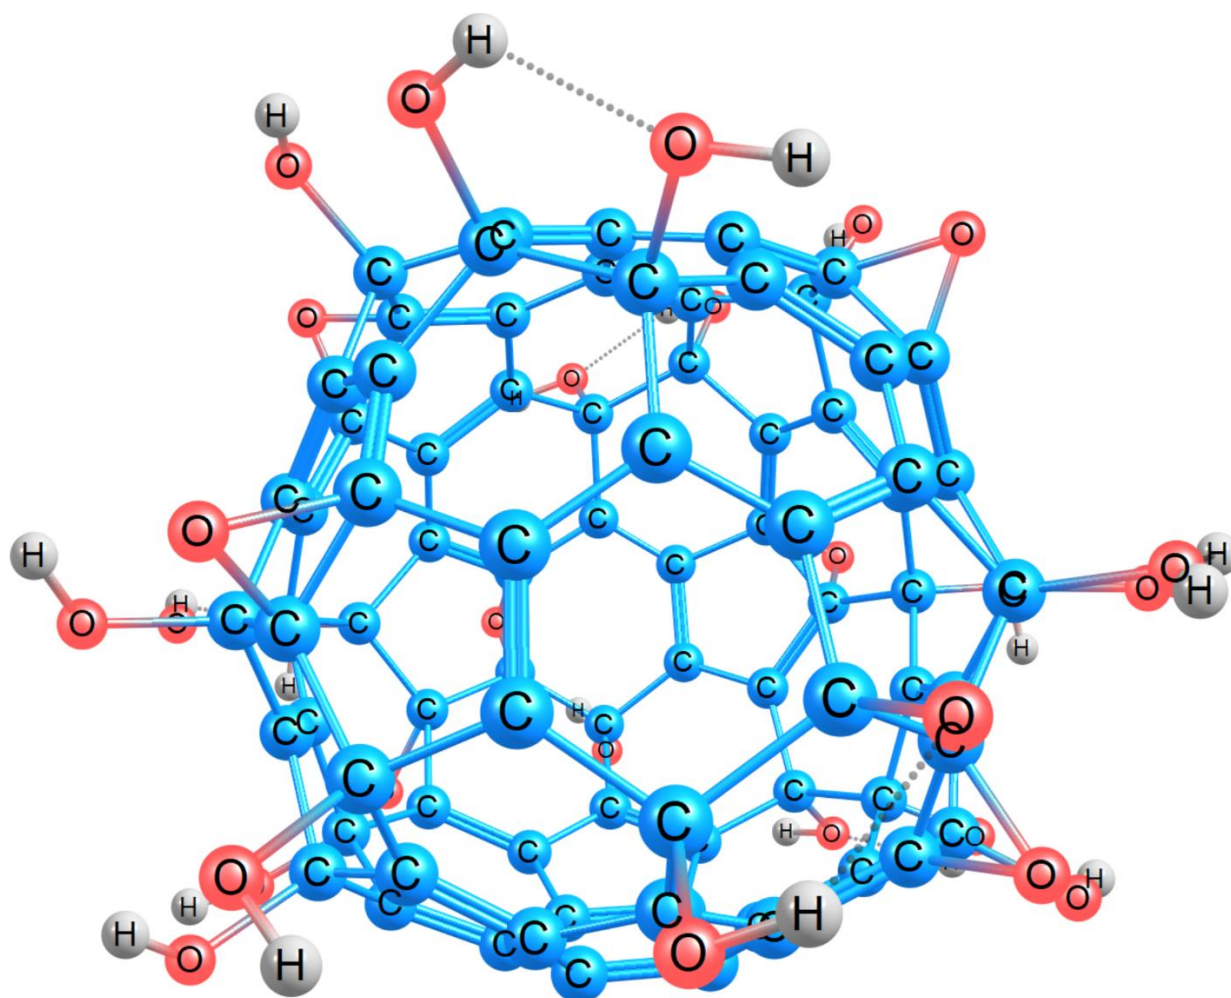

## DFTB3/3ob-3-1// Ground state

|   |                 |                 |                |
|---|-----------------|-----------------|----------------|
| C | -2.765254908745 | -0.043666591981 | 3.117980122574 |
| C | 2.726886020748  | -0.055216278990 | 3.062574343623 |
| C | -3.355090136464 | 1.211616035466  | 2.465873579907 |
| C | 3.379210082464  | 1.191329363467  | 2.444209692895 |
| C | -3.425757084427 | -1.289839417424 | 2.486555171860 |
| C | 3.399060264462  | -1.294617994400 | 2.431489772893 |
| C | -3.743010316284 | 0.630278337705  | 1.076692924528 |
| C | 3.680921512346  | 0.644564036724  | 1.019519707536 |
| C | -3.752357311301 | -0.716332028655 | 1.071837746500 |
| C | 3.662168988322  | -0.701351440690 | 1.006677973525 |
| C | 2.614036759803  | 3.351843261500  | 1.190793347448 |



|   |                 |                 |                 |
|---|-----------------|-----------------|-----------------|
| C | -2.607218414827 | 3.445541591454  | 1.267236194439  |
| C | 2.347643416936  | -3.215130115541 | 1.060609799523  |
| C | -2.549218681870 | -3.386073562449 | 1.169328674451  |
| C | 4.093279255167  | 1.494089822315  | -0.198229030909 |
| C | -4.056586869171 | 1.495048473310  | -0.141879742947 |
| C | 4.004473681177  | -1.527965935300 | -0.234462225888 |
| C | -4.123872027108 | -1.545586647298 | -0.169371561927 |
| C | 3.422736060461  | 3.012219939612  | -0.132233451945 |
| C | -3.292792370485 | 2.868259799706  | -0.034340843959 |
| C | 3.213434266556  | -2.873073730696 | -0.133383907944 |
| C | -3.433173985441 | -3.067724579615 | -0.093615598965 |
| C | -2.344599715926 | 2.359325112924  | 2.308355496968  |
| C | 2.479517621877  | 2.453437034904  | 2.393707528890  |
| C | -2.508886908872 | -2.549307457862 | 2.418901616915  |
| C | 2.547153347835  | -2.659620095811 | 2.475719107889  |
| C | -3.665785220327 | 0.669127667684  | -1.432817416368 |
| C | 3.730602930323  | 0.671843258691  | -1.518283222298 |
| C | -3.744955725312 | -0.703187025702 | -1.454972976356 |
| C | 3.643285348358  | -0.701806389665 | -1.514996210299 |
| C | -2.487106484858 | 3.377448403459  | -1.186171653482 |
| C | 2.375842328906  | 3.259177251529  | -1.210864263459 |
| C | -2.445716007894 | -3.351951557465 | -1.229512142418 |
| C | 2.476475713878  | -3.434849522433 | -1.317193663390 |
| C | 2.369051468920  | 2.623516611807  | -2.416797961928 |
| C | -2.393163734918 | 2.581031862809  | -2.413133485892 |
| C | 2.418476282922  | -2.637111239787 | -2.545403271835 |
| C | -2.383564927943 | -2.651150719776 | -2.380467976938 |
| C | -3.019622509606 | 1.384902354372  | -2.547481871867 |
| C | 3.218093766532  | 1.433039629326  | -2.709508380763 |
| C | -3.228724865550 | -1.451138873346 | -2.652609468778 |
| C | 3.011335008616  | -1.416019103337 | -2.643376747788 |
| C | -2.596815719823 | 0.757815603667  | -3.901182578245 |
| C | 2.502210375884  | 0.738597147648  | -3.848790371280 |
| C | -2.529364634867 | -0.747113653637 | -3.790904420268 |

|   |                 |                 |                 |
|---|-----------------|-----------------|-----------------|
| C | 2.566551618813  | -0.766803847678 | -3.979993308213 |
| C | -1.361679796358 | 2.857813651682  | -3.528603462407 |
| C | 1.185035348476  | 2.597285994829  | -3.239756602545 |
| C | -1.206079859448 | -2.616441240837 | -3.238651984515 |
| C | 1.342349324416  | -2.886833653699 | -3.634583269326 |
| C | -1.224685459420 | 1.411731498335  | -4.085353182133 |
| C | 1.191747392485  | 1.456152738350  | -4.015325001169 |
| C | -1.226470325437 | -1.466998791335 | -3.992668037165 |
| C | 1.190297414437  | -1.423568020368 | -4.150478684107 |
| C | -1.227054859442 | 3.977828602205  | -0.645499282686 |
| C | 1.181182211490  | 3.902443822210  | -0.745245759656 |
| C | -1.257241159437 | -4.123515076151 | -0.785301099667 |
| C | 1.183750382447  | -3.973119877208 | -0.807922735639 |
| C | -1.257042399404 | 4.023919706168  | 0.719986178696  |
| C | 1.337087760380  | 4.381491013005  | 0.704475164678  |
| C | -1.289625678394 | -4.156519938114 | 0.722853939648  |
| C | 1.230927603451  | -3.891167216221 | 0.662688388723  |
| C | 1.130832429471  | 2.388747528892  | 3.007064336652  |
| C | -1.160737707454 | 2.338995962914  | 2.979744759628  |
| C | 1.152742635475  | -2.465154370874 | 3.063498569628  |
| C | -1.171824855447 | -2.470889732861 | 3.078219776601  |
| C | -0.704536844678 | 1.148218475490  | 3.685600735341  |
| C | 0.681828713680  | 1.160192544449  | 3.657001800349  |
| C | -0.740967175645 | -1.296962465412 | 3.701644846331  |
| C | 0.721858691654  | -1.289164782420 | 3.690305751335  |
| C | 1.470003833354  | -0.059857093983 | 3.632991059335  |
| C | -1.492333735337 | -0.067747192965 | 3.659121100356  |
| C | -0.052018961000 | 0.742710455686  | -4.308400144046 |
| C | 0.012535478976  | -0.753304737673 | -4.323878801045 |
| C | -0.006958270977 | 3.512842276404  | -2.962843769646 |
| C | -0.015167437011 | -3.559573464383 | -3.051097231634 |
| C | -0.008423267022 | 3.885498111248  | -1.438339268353 |
| C | 0.036942992964  | -3.966771824225 | -1.537100990279 |
| C | -0.022017302006 | 4.272111075041  | 1.629324211239  |

|   |                 |                 |                 |
|---|-----------------|-----------------|-----------------|
| C | 0.025532051997  | -4.230198174081 | 1.567170735281  |
| C | 0.028146436003  | 3.113355899563  | 2.612356090796  |
| C | -0.002020827000 | -3.186540699548 | 2.662668210794  |
| O | -5.455063287536 | 1.775070760191  | -0.160195208951 |
| O | -3.771361101278 | 3.948711740220  | -0.842141231596 |
| O | 4.491023293955  | 3.940853103206  | -0.258983729894 |
| O | 5.493677521526  | 1.643239689229  | -0.128222422967 |
| O | 5.407606980568  | -1.777623994168 | -0.265310485875 |
| O | 3.698045094334  | -4.027423123192 | -0.837791287609 |
| O | -5.526882859485 | -1.726351892241 | -0.165660655932 |
| O | -4.500869415939 | -4.012148478204 | -0.115944364963 |
| O | -3.763823844296 | -1.450399126363 | -3.989006929184 |
| O | -3.487625231400 | 1.147089198488  | -4.944026396772 |
| O | 3.310683046490  | -3.599428815346 | 3.262154008495  |
| O | 4.685683400882  | -1.520298316297 | 3.015495858627  |
| O | -1.940704558103 | 3.699570112309  | -4.522720974974 |
| O | 0.176494306908  | 4.749327252862  | -3.691456127322 |
| O | 3.442370974425  | -1.133799293469 | -5.041998067701 |
| O | 3.735990202320  | 1.442594771346  | -4.052443095181 |
| O | -0.241207162866 | -4.752515274849 | -3.827957416271 |
| O | 1.881475914121  | -3.706249128302 | -4.665244621909 |
| O | -1.559571429303 | -5.339298637570 | -0.044089924996 |
| O | 0.149099091933  | -5.552638559462 | 2.105022177047  |
| O | -3.210430526524 | -3.812402129273 | 2.356629768927  |
| O | -4.628058466919 | -1.650240780276 | 3.156349573562  |
| O | -4.522812583970 | 1.676839813259  | 3.154985751550  |
| O | -3.449532979436 | 4.448393140966  | 1.838299524161  |
| O | -0.120076516951 | 5.504208243504  | 2.320569823934  |
| O | 1.840420209184  | 5.609157087463  | 0.767357490644  |
| O | 4.584990429917  | 1.528755903321  | 3.118063361573  |
| O | 3.241555313533  | 3.692587806313  | 2.355927411914  |
| H | 1.276370288432  | -4.456531058999 | -4.826447183837 |
| H | -1.111175842472 | -5.125277006686 | -3.604896260342 |
| H | -1.368067719354 | 4.481973615958  | -4.648398208888 |

|   |                 |                 |                 |
|---|-----------------|-----------------|-----------------|
| H | 1.015583234553  | 5.159390650669  | -3.420076285430 |
| H | -3.411023235462 | 2.109868667043  | -5.072679550705 |
| H | 3.395871618470  | -2.099140253071 | -5.163701011668 |
| H | -2.905339050678 | 5.065294246706  | 2.356668119937  |
| H | -4.880740857798 | 2.454227821880  | 2.690822227790  |
| H | 4.652446279903  | -2.364756249905 | 3.510575809400  |
| H | 2.796024005720  | -4.420439137995 | 3.354308488484  |
| H | -5.213099695638 | -0.874641943588 | 3.197860213556  |
| H | 5.171189602652  | 0.750794949678  | 3.116770415604  |
| H | 5.746451318408  | 2.535741703856  | -0.430062609824 |
| H | 4.157289241128  | 4.834190797826  | -0.053870312000 |
| H | -4.646801186877 | -4.332002253012 | 0.794543182649  |
| H | -5.724440326417 | -2.650440855802 | -0.423336672795 |
| H | 5.701971800421  | -2.091722501034 | 0.605208824725  |
| H | -5.614987267429 | 2.501170866870  | -0.788482636639 |
| H | -0.258910439903 | -6.175787850214 | 1.475925596333  |
| H | 0.599570082725  | 6.080078922257  | 1.957854670127  |

## Second isomer

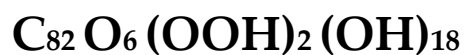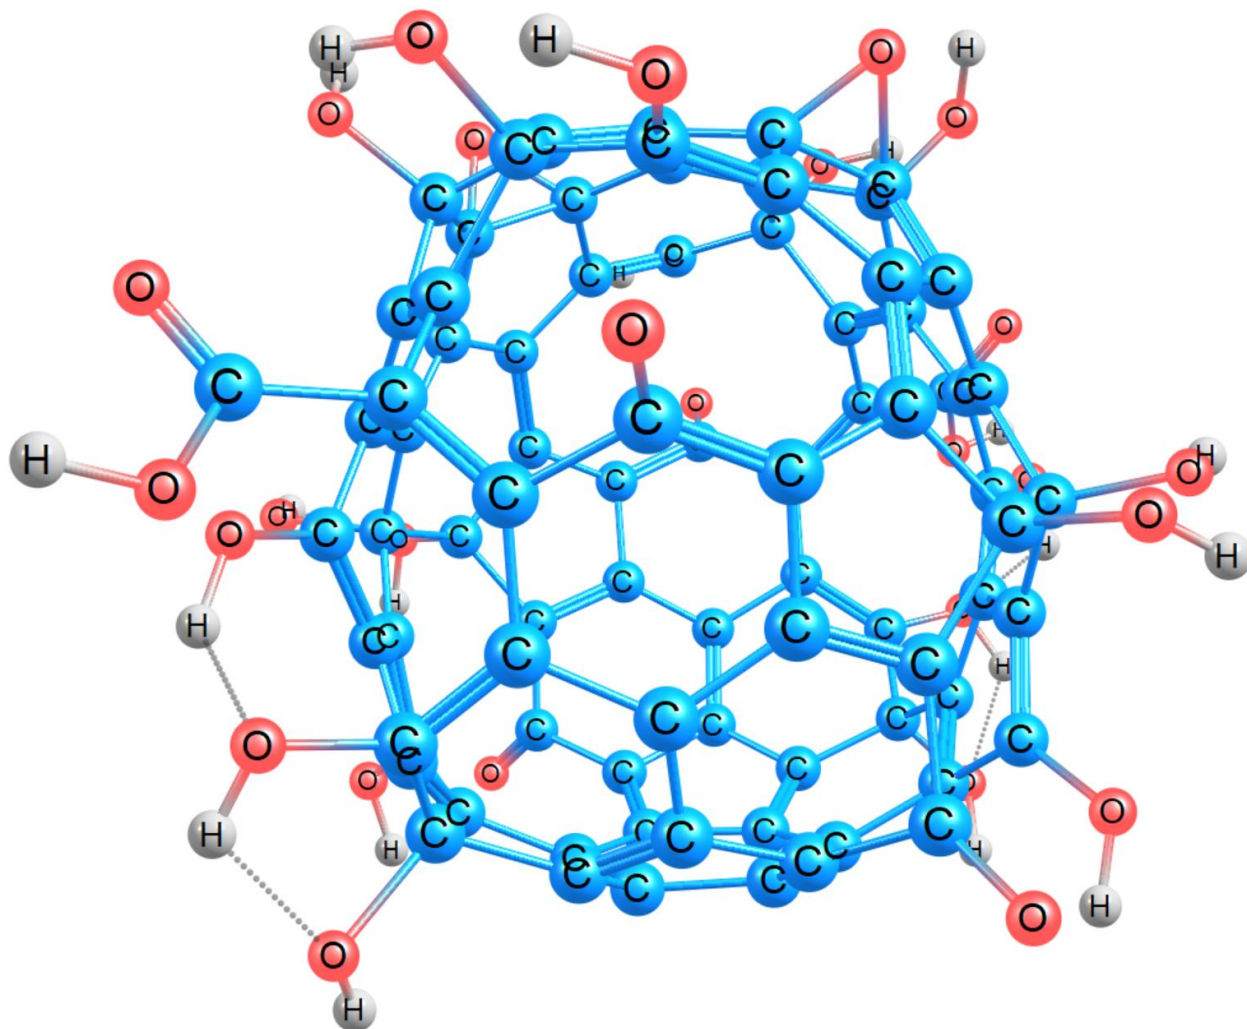

### DFTB3/3ob-3-1// Ground state

|   |                 |                 |                |
|---|-----------------|-----------------|----------------|
| C | -2.815265689710 | -0.004010644001 | 3.169549066584 |
| C | 2.842191235693  | -0.032626075988 | 3.147448682585 |
| C | -3.142173369572 | 1.146448036484  | 2.346297920914 |
| C | 3.523276714423  | 1.092677568483  | 2.476644576878 |
| C | -3.537556951380 | -1.111056647519 | 2.498733696863 |
| C | 3.164417208548  | -1.168577408495 | 2.306297255973 |
| C | -3.554642873410 | 0.644053804708  | 1.072738636528 |
| C | 3.639858459359  | 0.798993114624  | 1.117756752495 |
| C | -3.671564438354 | -0.793670358647 | 1.142213250463 |
| C | 3.552168942413  | -0.646577850696 | 1.033423248557 |
| C | 2.161086188041  | 3.363489201458  | 1.306551419424 |

|   |                 |                 |                 |
|---|-----------------|-----------------|-----------------|
| C | -2.723566331789 | 3.597832593345  | 1.749566194190  |
| C | 2.744949734750  | -3.616755855350 | 1.678335749240  |
| C | -2.138882508008 | -3.322112884483 | 1.278923634435  |
| C | 3.818704707251  | 1.668764689251  | -0.127950298965 |
| C | -3.890423402246 | 1.243517234457  | -0.175527807896 |
| C | 3.869962669244  | -1.230636983433 | -0.222678376888 |
| C | -3.855794256277 | -1.648083295262 | -0.114467438934 |
| C | 3.095875475576  | 3.140755361555  | 0.019454645976  |
| C | -3.952953388188 | 4.348447608047  | -1.566378074276 |
| C | 3.944752805197  | -4.325995081037 | -1.647863879272 |
| C | -3.078691709625 | -3.110300377580 | 0.041525218986  |
| C | -2.677512495769 | 2.526615261872  | 2.828095650692  |
| C | 2.211134601976  | 3.354410329493  | 2.823919504707  |
| C | -2.200732027995 | -3.322767165478 | 2.780900015749  |
| C | 2.707532844774  | -2.556864822838 | 2.773494589732  |
| C | -3.476449365413 | 0.597562138704  | -1.401543698349 |
| C | 3.340184722467  | 0.860620440598  | -1.395893211366 |
| C | -3.365022184450 | -0.829527410627 | -1.373653725402 |
| C | 3.455871464419  | -0.569167946729 | -1.438956228329 |
| C | -2.627434636825 | 3.704050835309  | -1.438955835362 |
| C | 2.073464049064  | 3.455706039430  | -1.118625723505 |
| C | -2.096572694055 | -3.426553803427 | -1.133927650490 |
| C | 2.611653833798  | -3.688922330344 | -1.520683567336 |
| C | 2.115419993036  | 2.817082604713  | -2.413440517919 |
| C | -2.321549503957 | 2.670274977800  | -2.484951925878 |
| C | 2.301674185934  | -2.639528619782 | -2.547122204855 |
| C | -2.146002141003 | -2.771773639753 | -2.420229057885 |
| C | -2.897393776712 | 1.410075973345  | -2.502796059844 |
| C | 2.855744455712  | 1.581836883266  | -2.511861460862 |
| C | -2.889050902668 | -1.539422412287 | -2.503294071887 |
| C | 2.868556618717  | -1.374321666367 | -2.547309130844 |
| C | -2.595415580800 | 0.707094421665  | -3.835173818269 |
| C | 2.391077812926  | 0.840746495631  | -3.706144575313 |
| C | -2.433686036915 | -0.785811710626 | -3.694487188299 |

|   |                 |                 |                 |
|---|-----------------|-----------------|-----------------|
| C | 2.548240259860  | -0.649548346701 | -3.864061527243 |
| C | -1.442160504365 | 2.872706414692  | -3.842403255278 |
| C | 1.056171749535  | 2.822870221736  | -3.381978669461 |
| C | -1.084350116517 | -2.768513630769 | -3.398198234459 |
| C | 1.403130590374  | -2.815363857699 | -3.916588041246 |
| C | -1.295657200408 | 1.401281380372  | -4.254007880076 |
| C | 1.141788708490  | 1.540413611282  | -4.166686452104 |
| C | -1.188178025476 | -1.478329087330 | -4.171686351114 |
| C | 1.241637993434  | -1.331841751403 | -4.271856244074 |
| C | -1.623411932281 | 4.085174052141  | -0.499754056783 |
| C | 0.931835249577  | 3.994704958192  | -0.569657256717 |
| C | -0.933994351598 | -3.951101998187 | -0.604531771751 |
| C | 1.622536616277  | -4.086251871155 | -0.573304206720 |
| C | -1.610101236258 | 3.944899458205  | 0.945420224571  |
| C | 0.928217844598  | 3.806930110280  | 0.860604501620  |
| C | -0.902635887589 | -3.761429067314 | 0.817503440624  |
| C | 1.629782532237  | -3.951386731213 | 0.875859357602  |
| C | 1.021889217522  | 2.547928820845  | 3.313440315497  |
| C | -1.288874405401 | 2.334260364921  | 3.361347138469  |
| C | 1.324627545384  | -2.372300326923 | 3.328510577467  |
| C | -0.986510412550 | -2.582601562817 | 3.291646090488  |
| C | -0.751467347638 | 1.138731408472  | 3.861341217246  |
| C | 0.731584313681  | 1.258144934435  | 3.818890984257  |
| C | -0.694047026673 | -1.299232110390 | 3.815983942266  |
| C | 0.789394189642  | -1.182015032444 | 3.851226746251  |
| C | 1.541273943314  | 0.049652530984  | 3.793571477255  |
| C | -1.506730077328 | -0.094463376955 | 3.799111497270  |
| C | -0.095929435958 | 0.775841542669  | -4.441316223000 |
| C | 0.042815047996  | -0.704628709690 | -4.450729185994 |
| C | -0.101654526932 | 3.585161747389  | -3.675891868336 |
| C | 0.073551655976  | -3.528393763381 | -3.711238660306 |
| C | -0.312779725882 | 4.586886147932  | -1.083705703513 |
| C | 0.290717829844  | -4.572526782943 | -1.126178914489 |
| C | -0.303905257837 | 3.803529666280  | 1.618776403240  |

|   |                 |                 |                 |
|---|-----------------|-----------------|-----------------|
| C | 0.326545370826  | -3.801545923281 | 1.560965066273  |
| C | -0.224058253873 | 3.129387514561  | 2.861818549718  |
| C | 0.255726206879  | -3.151401210595 | 2.818546995697  |
| O | -4.605168884905 | 2.347909522923  | -0.243710704876 |
| O | -4.209147462105 | 5.360237231546  | -0.689778195663 |
| O | 4.088263120152  | 4.135247253109  | -0.014303483978 |
| O | 5.216521478658  | 1.965501771129  | -0.352376352828 |
| O | 4.578518152945  | -2.342803318924 | -0.310036413872 |
| O | 4.171364383112  | -5.373671957561 | -0.805321111631 |
| O | -5.233470362620 | -1.924324507139 | -0.361931343821 |
| O | -4.093821390168 | -4.123269909126 | 0.061138779960  |
| O | -2.388644669905 | -1.469161702321 | -4.977638000721 |
| O | -3.659313413317 | 1.000191439565  | -4.763865048853 |
| O | 3.680735138342  | -3.026146318652 | 3.786078860290  |
| O | -2.221703475993 | 3.656795360367  | -4.742063677834 |
| O | -0.075944920940 | 4.856704703787  | -3.951682643215 |
| O | 3.598139100375  | -0.930294958595 | -4.814628785807 |
| O | 2.334086519928  | 1.532364280325  | -4.983488221741 |
| O | 0.085328969954  | -4.812697139832 | -3.949337047226 |
| O | 2.176340570038  | -3.526277067402 | -4.859478806822 |
| O | -2.949290407649 | -4.001687053204 | 3.474467317422  |
| O | -4.287499246064 | -2.028505825060 | 3.117681400588  |
| O | 4.211666117099  | 2.055111324061  | 3.096977703578  |
| O | 2.878753579714  | 4.088424890166  | 3.531846460406  |
| H | 3.049545295630  | -3.097994723617 | -4.935907754761 |
| H | -3.118588198563 | 3.271169647536  | -4.794668156844 |
| H | 5.698411328405  | 1.135923403485  | -0.504178438757 |
| H | 4.897012673758  | 3.803051126266  | 0.411225344837  |
| H | -4.273571811050 | -4.379041940003 | 0.982293081547  |
| H | -5.343488712559 | -2.895453688667 | -0.445724471797 |
| O | 4.758029316865  | -4.074636446150 | -2.542625044869 |
| O | 3.950580606194  | -4.160236550121 | 1.518932960306  |
| O | -4.732869414854 | 4.141906186138  | -2.503636534870 |
| O | -3.924670362224 | 4.141686800098  | 1.602346243265  |



|   |                 |                 |                 |
|---|-----------------|-----------------|-----------------|
| H | -4.867720425815 | 2.680262031803  | 0.629817348702  |
| H | 4.815862629822  | -2.709125635749 | 0.557970903757  |
| H | -5.027024266700 | 5.805561412345  | -0.966669595561 |
| H | 4.994039740755  | -5.813382636369 | -1.076613975516 |
| H | -3.690626260342 | 0.276151542898  | -5.415695940551 |
| H | 3.604114234372  | -0.206756036886 | -5.468317921516 |
| H | 4.019249315194  | 2.104444660038  | 4.045311088169  |
| H | -4.059030317177 | -2.135289299024 | 4.053713177147  |
| O | -3.641567149360 | 2.984058054650  | 3.853387144226  |
| H | -4.440942948989 | 3.935155040225  | 2.411993516916  |
| H | -3.612908069351 | 2.359442398923  | 4.599688890894  |
| H | 4.462705265985  | -3.976884550205 | 2.336345548923  |
| H | 3.627531843363  | -2.434944160905 | 4.557655609942  |
| O | 0.297754584845  | -5.631045318428 | -1.746059830230 |
| O | -0.376674590815 | 5.621635938440  | -1.736844887215 |
| H | -0.970886692562 | 5.162910590671  | -4.196958448121 |
| H | -0.758715535673 | -5.247276914605 | -3.748203558298 |
